# Supplementary material for: Isomer-Specific Effects of cis-9,trans-11- and trans-10,cis-12-CLA on Immune Regulation in Ruminal Epithelial Cells
Source: MDPI journal article supplement (doi:10.3390/ani11041169), 2021-04-19
Supplement: s1 [file s1]

# Isomer-Specific Effects of *cis*-9,*trans*-11- and *trans*-10,*cis*-12-CLA on Immune Regulation in Ruminal Epithelial Cells

Yang et al. Online Supplementary Material

**Table S1.** Primers used in mRNA abundance analysis.

| Gene           | NCBI accession | Primer sequence 5'-3'                                        |
|----------------|----------------|--------------------------------------------------------------|
| TNF- $\alpha$  | NM_001024860   | F: GTCCAACTTTAAACAGCTGCACTTA<br>R: CCCAAACTTGTGGACCCGA       |
| IL-6           | NM_001009392   | F: ACACTGACATGCTGGAGAAGATGC<br>R: CCGAATAGCTCTCAGGCTGAACTG   |
| NF- $\kappa$ B | XM_027960471   | F: ATTGAGCGTCCTGTAACCGTGTTTC<br>R: TGCACCTCCTCCTTGTCTTCTACC  |
| IL-1 $\beta$   | NM_001009465   | F: GCAACCGTACCTGAACCCAT<br>R: TGTTGGGTGCAGCTCTTCAT           |
| CX3CL1         | XM_027977870   | F: AGGCATGAGTGAGCCTGAAGA<br>R: TAAGACAGCGCGGGAAGAG           |
| CCL20          | XM_012147649   | F: GTCTCCGATACACAGAACGAATACT<br>R: TTCACCCACTTCTTCTTTGGATCTG |
| CD40           | XM_012189293   | F: AAACAGAATGCCAGTCCTGCGGTAA<br>R: ACGCAAGTGGTGTCTGTATTCAAGG |
| ICAM-1         | NM_001009731   | F: CAATACATCCTCCAAAAGCCATCAT<br>R: CACATCACTCAGTTCAAAAACCTTC |
| IRF1           | NM_001009751   | F: ATTGAAGAGGTGAAGGACCAGAGCA<br>R: TCGGCTGGACTTGGACTTTCTCTCT |
| RIPK2          | XM_012184164   | F: AAAGCGAGGGCTTCTGTCAA<br>R: CATCTGGATTTTGCGCCAC            |
| MMP13          | NM_001166179   | F: GCCACTTTATGCTTCCTGACGATGA<br>R: CGGCGTTTTCGGATGTTTAGAGTTG |
| CDK17          | XM_027967633   | F: GAGAAGGCTATCCCTCACGC<br>R: CACTCTCGCCATCTGATCCC           |
| WNT10A         | XM_004004935   | F: AGTCCTATCTTCAGCAGAGGTTTCC<br>R: AGGGTGCTCGGGAACCCGTGGCTC  |
| TLR4           | NM_001135930   | F: GGTTTCAGGAATGCCACTT<br>R: CTTTCACCTCTGCCATACTTT           |
| TICAM1         | XM_004023497   | F: CACGACACCAGGTCAGCTC<br>R: GCCAGTGGACCTTAGGGAAC            |
| PPAR $\gamma$  | NM_001100921   | F: GCTGCTCCAGAAAATGACGG<br>R: GTGGGTGGAGACTCATGTCC           |
| SCD            | NM_001009254   | F: TGCTGATCCCCACAATTCCC<br>R: TGAAGCACAACAGCAGGACA           |
| FADS2          | XM_015103138   | F: ACCTCTCTGTTTACAAGAAGTCCAT<br>R: TGGAAGATGTTGGGTTTGGCGTGGT |

---

|        |              |                                                       |
|--------|--------------|-------------------------------------------------------|
| SREBF1 | XM_027974781 | F: AAACGCTACCGCTCTTCCATCA<br>R: TCCACCACCTCGGGCTTCAT  |
| CPT1A  | NM_001009414 | F: GGCGCCGGGTGCATT<br>R: GACTGTGAACTGGAAGGCGA         |
| YWHAZ  | NM_001267887 | F: GATGAAGCCATTGCTGAACTTGA<br>R: CAGCTTCGTCTCCTTGGGTA |
| GAPDH  | NM_001190390 | F: GTCTTCACTACCATGGAGAAGG<br>R: TCATGGATGACCTTGGCCAG  |

---

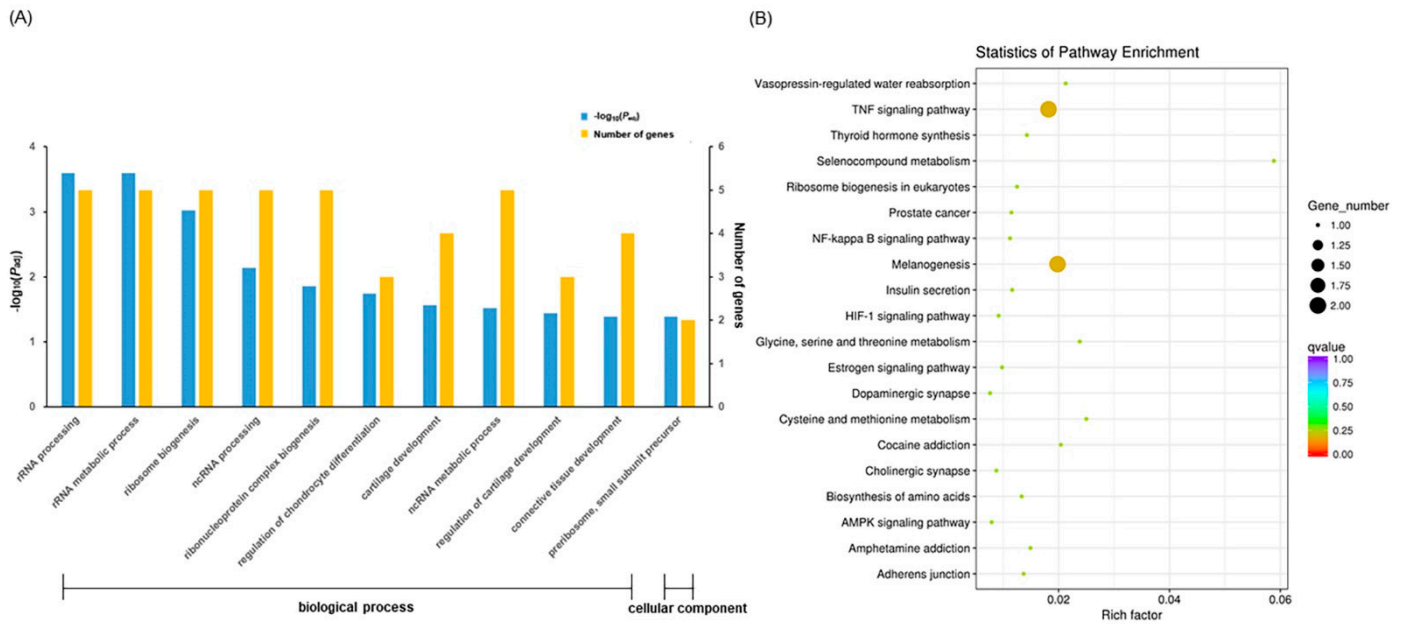

**Figure S1.** Effect of *cis*-9,*trans*-11-CLA pretreatment on the GO terms (A) and KEGG pathways (B) in RECs upon LPS stimulation. The DEGs used for functional annotation were significantly downregulated in the *c*-9,*t*-11-CLA+LPS group and upregulated in the LPS group. The circle size indicates the number of enriched genes, and the circle color indicates the  $P_{adj}$  value.
